# Supplementary material
Source: HighWire-hosted journal article supplement (https://delf06.com/highwire/filestream/93978/field_highwire_adjunct_files/0/Appendix_1_search_strategy.pdf)
Supplement: Appendix_1_search_strategy.pdf [file Appendix_1_search_strategy.pdf]

**Appendix 1: Search strategy for ‘Helping pregnant women make better decisions: a systematic review of the benefits of patient decision aids in obstetrics’**

**MEDLINE (inception until May 2011)**

1. (Pregnancy OR pregnan\* OR Prenatal Diagnosis OR Parturition)
2. (Decision Support Techniques OR patient decision aid.mp OR decision aid.mp OR shared decision making.mp)
3. 1 and 2
